# Supplementary material for: A robust error correction method for numerical weather prediction wind speed based on Bayesian optimization, variational mode decomposition, principal component analysis, and random forest: VMD-PCA-RF (version 1.0.0)
Source: Copernicus journal article supplement (doi:10.5194/gmd-16-6247-2023), 2023-11-02
Supplement: Supplementary file 1 [file gmd-16-6247-2023-supplement.pdf]

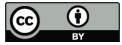

*Supplement of*

**A robust error correction method for numerical weather prediction wind speed based on Bayesian optimization, variational mode decomposition, principal component analysis, and random forest: VMD-PCA-RF (version 1.0.0)**

**Shaohui Zhou et al.**

*Correspondence to:* Chloe Yuchao Gao ([gyc@fudan.edu.cn](mailto:gyc@fudan.edu.cn))

The copyright of individual parts of the supplement might differ from the article licence.

1

**Table S1. The best hyper-parameters of the models**

| Model            | parameters                                                                                                                                                                                  |
|------------------|---------------------------------------------------------------------------------------------------------------------------------------------------------------------------------------------|
| VMD-PCA-lightGBM | 'max_depth': 28, 'min_child_samples': 30, 'n_estimators': 436,<br>'num_leaves': 287                                                                                                         |
| VMD-PCA-XGBoost  | 'gamma': 1, 'max_depth': 19, 'min_child_weight': 1, 'n_estimators':<br>408                                                                                                                  |
| VMD-PCA-RF       | 'max_depth': 31, 'max_features': 14, 'min_samples_leaf': 28,<br>'min_samples_split': 3, 'n_estimators': 371                                                                                 |
| VMD-PCA-DBN      | 'input_length': 20, 'output_length': 1, 'loss_function':<br>'MSE', 'optimizer': 'Adam', 'hidden_units': [400,<br>200], 'batch_size': 20000, 'epoch_pretrain': 100, 'epoch_finetune':<br>200 |
| VMD-PCA-MLP      | 'batch_size': 10114, 'hidden_layer_sizes': 305, 'max_iter': 386                                                                                                                             |
| lightGBM         | 'max_depth': 21, 'min_child_samples': 19, 'n_estimators': 312,<br>'num_leaves': 297                                                                                                         |
| XGBoost          | 'gamma': 0, 'max_depth': 21, 'min_child_weight': 9, 'n_estimators':<br>299                                                                                                                  |
| RF               | 'max_depth': 40, 'max_features': 12, 'min_samples_leaf': 23,<br>'min_samples_split': 2, 'n_estimators': 440                                                                                 |
| DBN              | 'input_length': 12, 'output_length': 1, 'loss_function':<br>'MSE', 'optimizer': 'Adam', 'hidden_units': [400, 200], 'batch_size':<br>20000, 'epoch_pretrain': 100, 'epoch_finetune': 200    |
| MLP              | 'batch_size': 10232, 'hidden_layer_sizes': 494, 'max_iter': 311                                                                                                                             |

2

3

**Table S2. Table of evaluation indices of wind speed error predicted by 10 models in December 2021**

| Model            | MAE (m s <sup>-1</sup> ) | RMSE(m s <sup>-1</sup> ) | rMAE (%) | rRMSE (%) | FA (%) | R    |
|------------------|--------------------------|--------------------------|----------|-----------|--------|------|
| VMD-PCA-lightGBM | 0.47                     | 0.63                     | 37.67    | 51.25     | 91.13  | 0.81 |
| VMD-PCA-XGBoost  | 0.49                     | 0.68                     | 39.84    | 54.82     | 89.22  | 0.78 |
| VMD-PCA-RF       | 0.46                     | 0.62                     | 37.36    | 50.39     | 91.79  | 0.82 |
| VMD-PCA-DBN      | 0.53                     | 0.75                     | 43.32    | 61.13     | 87.93  | 0.71 |

1

|             |      |      |       |       |       |      |
|-------------|------|------|-------|-------|-------|------|
| VMD-PCA-MLP | 0.53 | 0.72 | 43.04 | 58.47 | 87.2  | 0.75 |
| lightGBM    | 0.49 | 0.67 | 39.59 | 54.16 | 89.68 | 0.79 |
| XGBoost     | 0.51 | 0.70 | 41.51 | 56.64 | 87.9  | 0.77 |
| RF          | 0.48 | 0.65 | 38.80 | 52.32 | 90.64 | 0.81 |
| DBN         | 0.56 | 0.77 | 45.25 | 62.46 | 86.74 | 0.71 |
| MLP         | 0.55 | 0.74 | 44.65 | 60.1  | 86.08 | 0.75 |

4

5 **Table S3. Table of evaluation indices of wind speed error predicted by 10 models in January 2022**

| Model            | MAE (m s <sup>-1</sup> ) | RMSE(m s <sup>-1</sup> ) | rMAE (%) | rRMSE (%) | FA (%) | R    |
|------------------|--------------------------|--------------------------|----------|-----------|--------|------|
| VMD-PCA-lightGBM | 0.45                     | 0.63                     | 34.75    | 48.65     | 91.49  | 0.78 |
| VMD-PCA-XGBoost  | 0.47                     | 0.66                     | 36.31    | 51.01     | 90.23  | 0.76 |
| VMD-PCA-RF       | 0.46                     | 0.64                     | 35.06    | 49.00     | 91.57  | 0.78 |
| VMD-PCA-DBN      | 0.53                     | 0.75                     | 40.96    | 57.49     | 87.61  | 0.67 |
| VMD-PCA-MLP      | 0.50                     | 0.69                     | 38.46    | 53.16     | 88.94  | 0.73 |
| lightGBM         | 0.46                     | 0.64                     | 35.24    | 49.34     | 91.11  | 0.77 |
| XGBoost          | 0.48                     | 0.67                     | 36.68    | 51.38     | 89.88  | 0.75 |
| RF               | 0.46                     | 0.64                     | 35.18    | 49.13     | 91.36  | 0.78 |
| DBN              | 0.53                     | 0.74                     | 40.97    | 56.86     | 87.71  | 0.68 |
| MLP              | 0.49                     | 0.68                     | 37.83    | 52.26     | 89.57  | 0.74 |

6

7

8

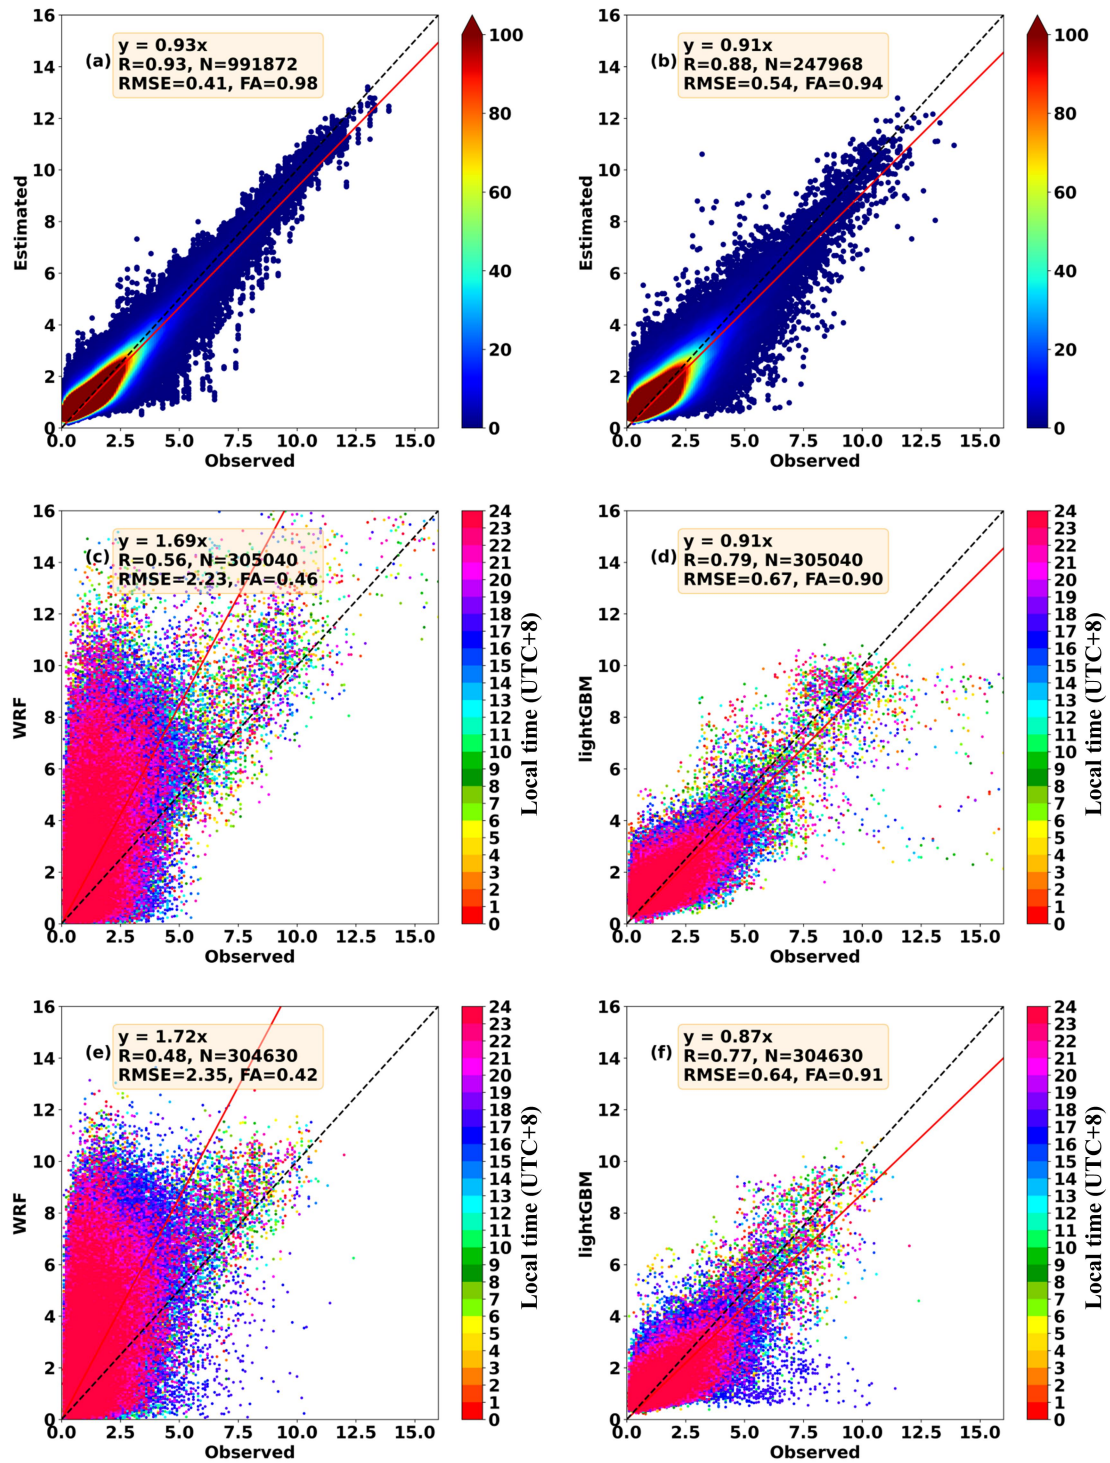

9

10 Figure S1. The scatter density map compared with the actual 10-meter wind speed: (a) 10-fold  
 11 cross-validation training set of lightGBM model in February 2022, (b) 10-fold cross-validation validation set  
 12 of lightGBM model in February 2022. The 24-hour scatter map compared with the actual 10-meter wind  
 13 speed: (c) WRF forecasts in December 2021, (d) lightGBM model forecasts in December 2021, (e) WRF  
 14 forecasts in January 2022, and (f) lightGBM model forecasts in January 2022.

15



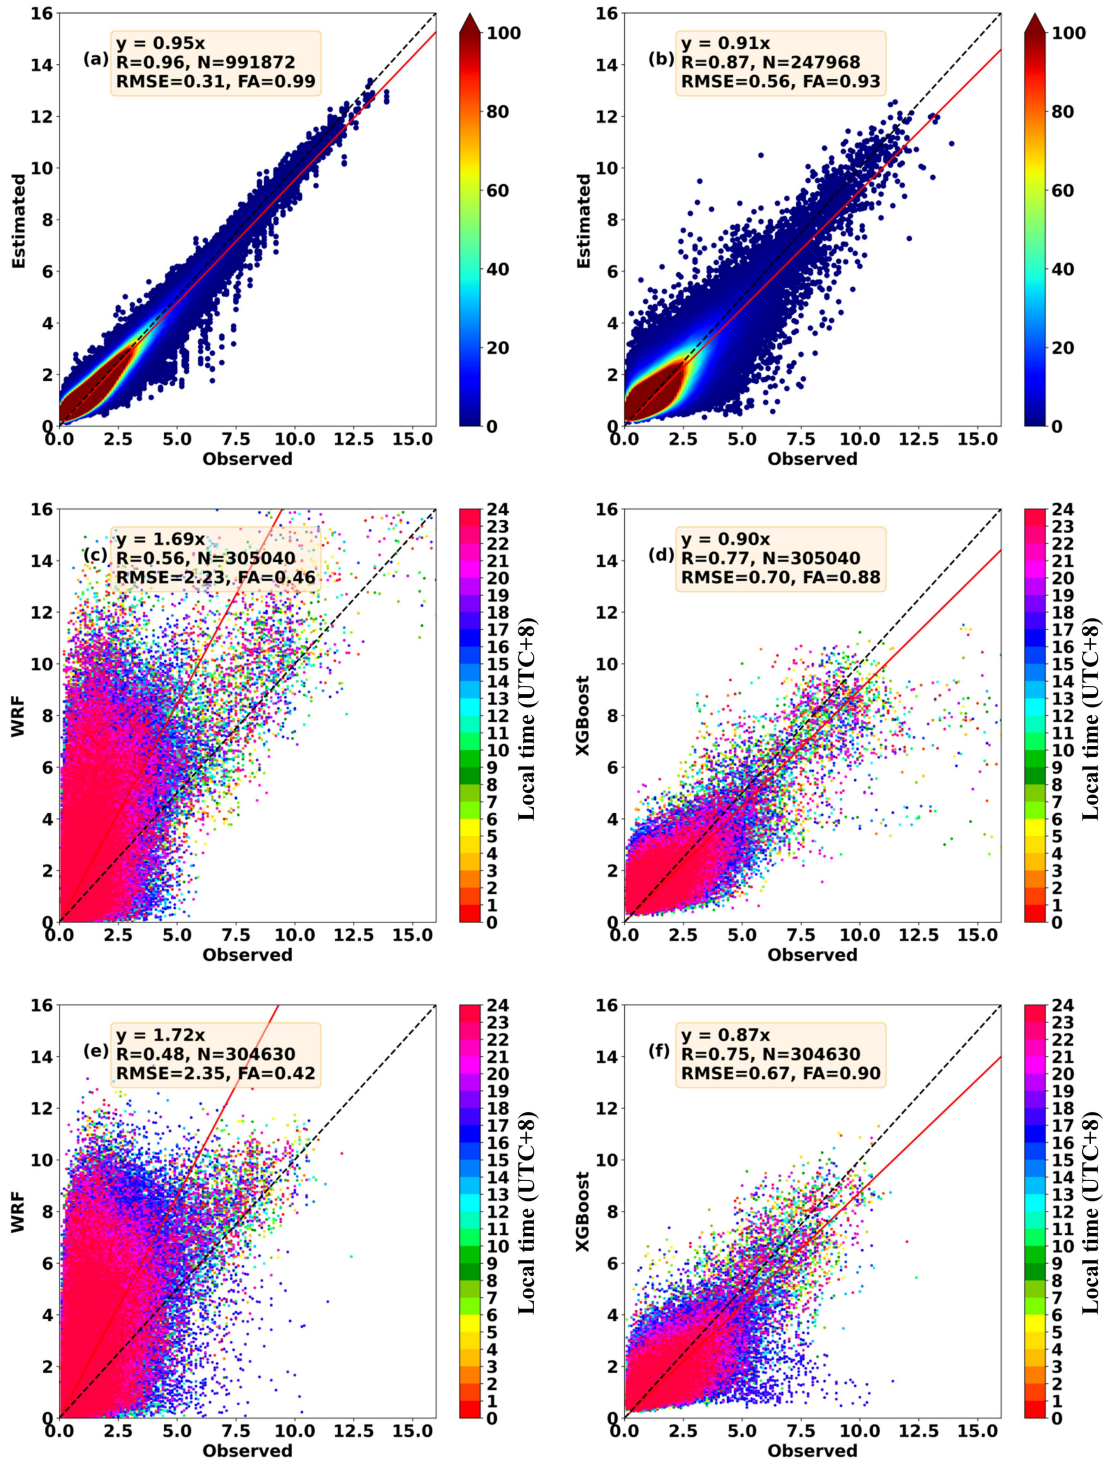

16

17 Figure S2. The scatter density map compared with the actual 10-meter wind speed: (a) 10-fold  
 18 cross-validation training set of XGBoost model in February 2022, (b) 10-fold cross-validation validation set  
 19 of XGBoost model in February 2022. The 24-hour scatter map compared with the actual 10-meter wind  
 20 speed: (c) WRF forecasts in December 2021, (d) XGBoost model forecasts in December 2021, (e) WRF  
 21 forecasts in January 2022, and (f) XGBoost model forecasts in January 2022.

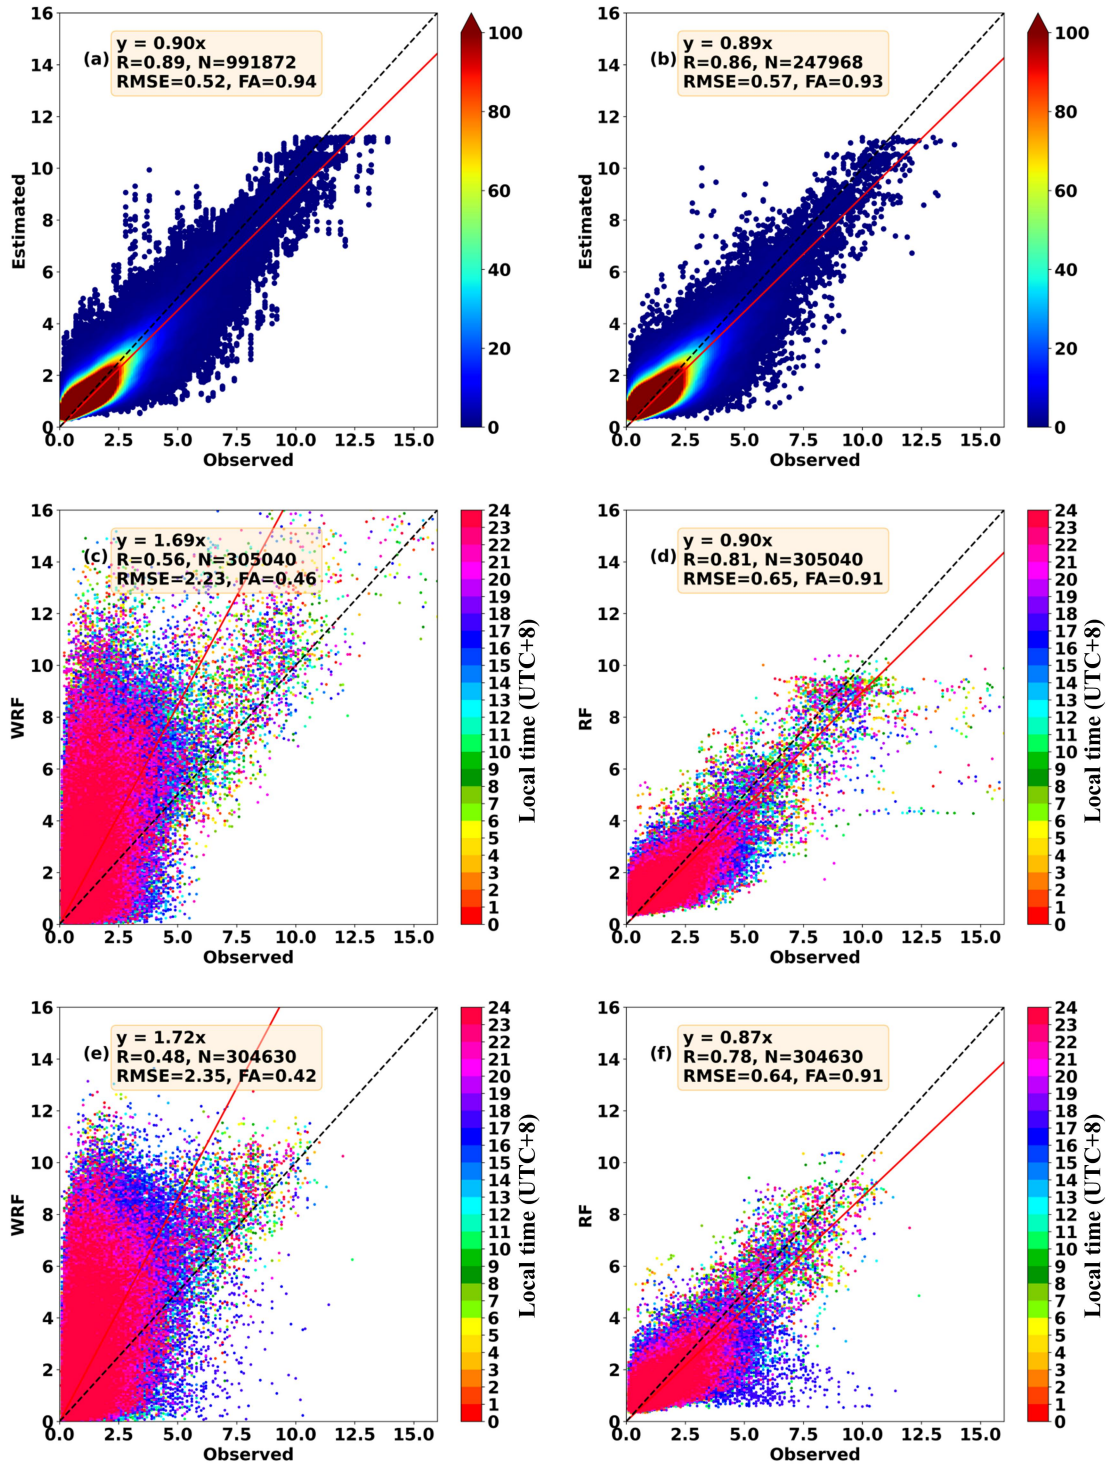

22  
23  
24  
25  
26  
27  
28

Figure S3. The scatter density map compared with the actual 10-meter wind speed: (a) 10-fold cross-validation training set of RF model in February 2022, (b) 10-fold cross-validation validation set of RF model in February 2022. The 24-hour scatter map compared with the actual 10-meter wind speed: (c) WRF forecasts in December 2021, (d) RF model forecasts in December 2021, (e) WRF forecasts in January 2022, and (f) RF model forecasts in January 2022.

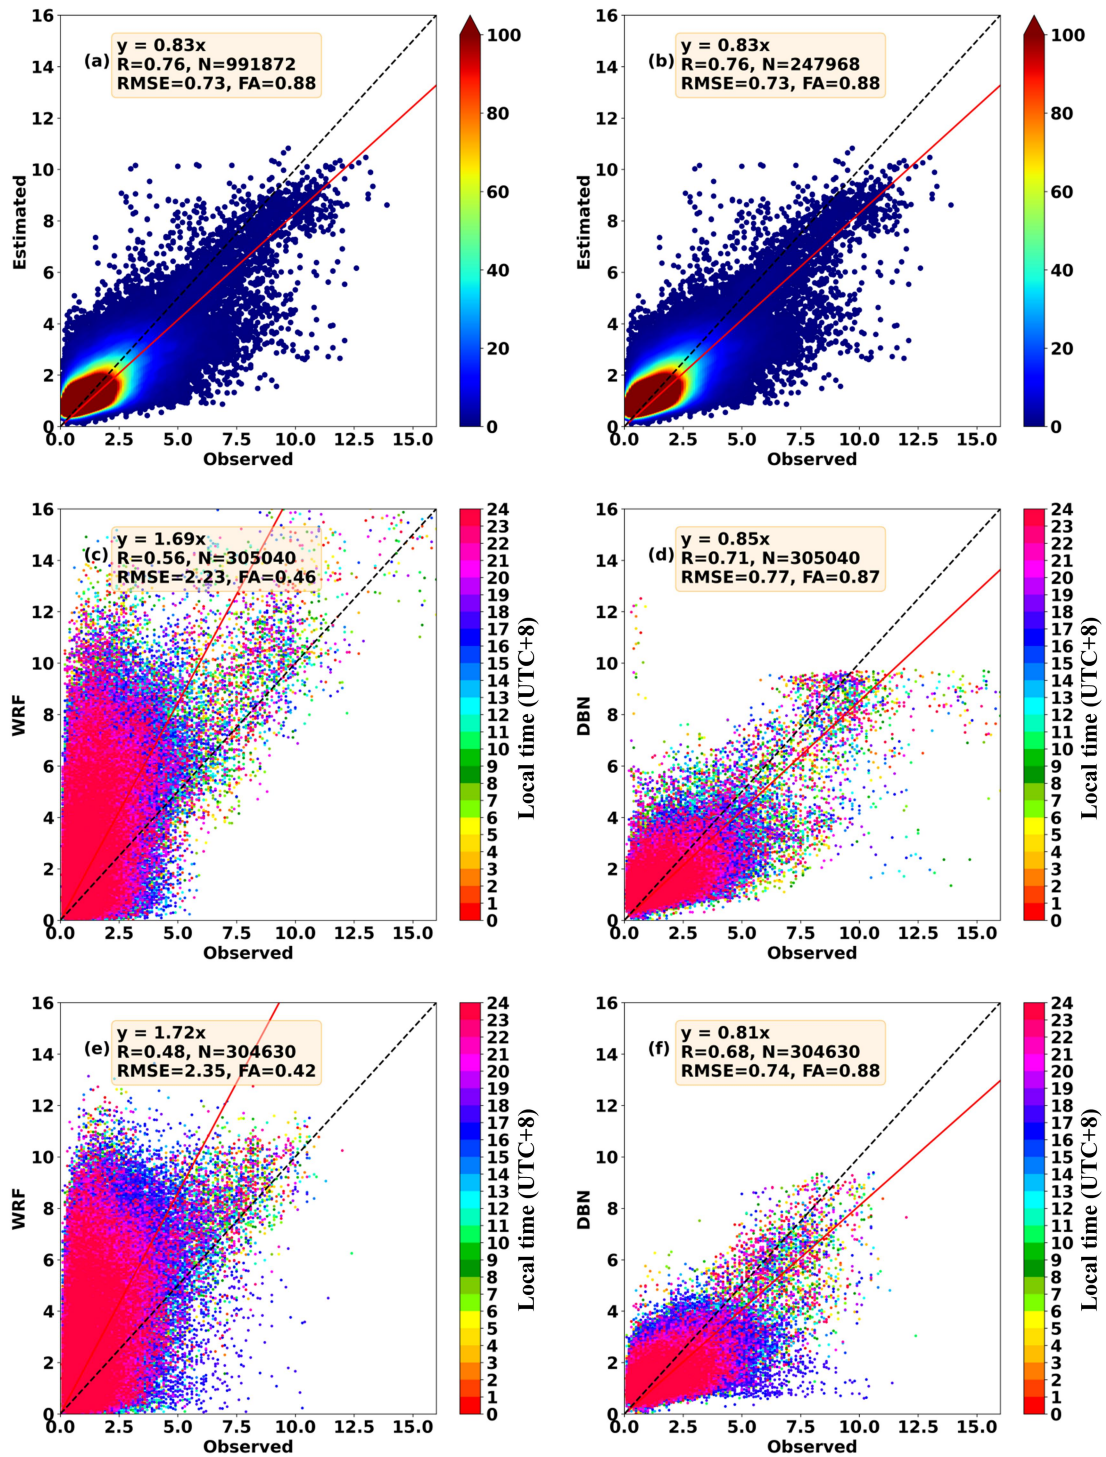

29

30 Figure S4. The scatter density map compared with the actual 10-meter wind speed: (a) 10-fold  
 31 cross-validation training set of DBN model in February 2022, (b) 10-fold cross-validation validation set of  
 32 DBN model in February 2022. The 24-hour scatter map compared with the actual 10-meter wind speed: (c)  
 33 WRF forecasts in December 2021, (d) DBN model forecasts in December 2021, (e) WRF forecasts in  
 34 January 2022, and (f) DBN model forecasts in January 2022.

35



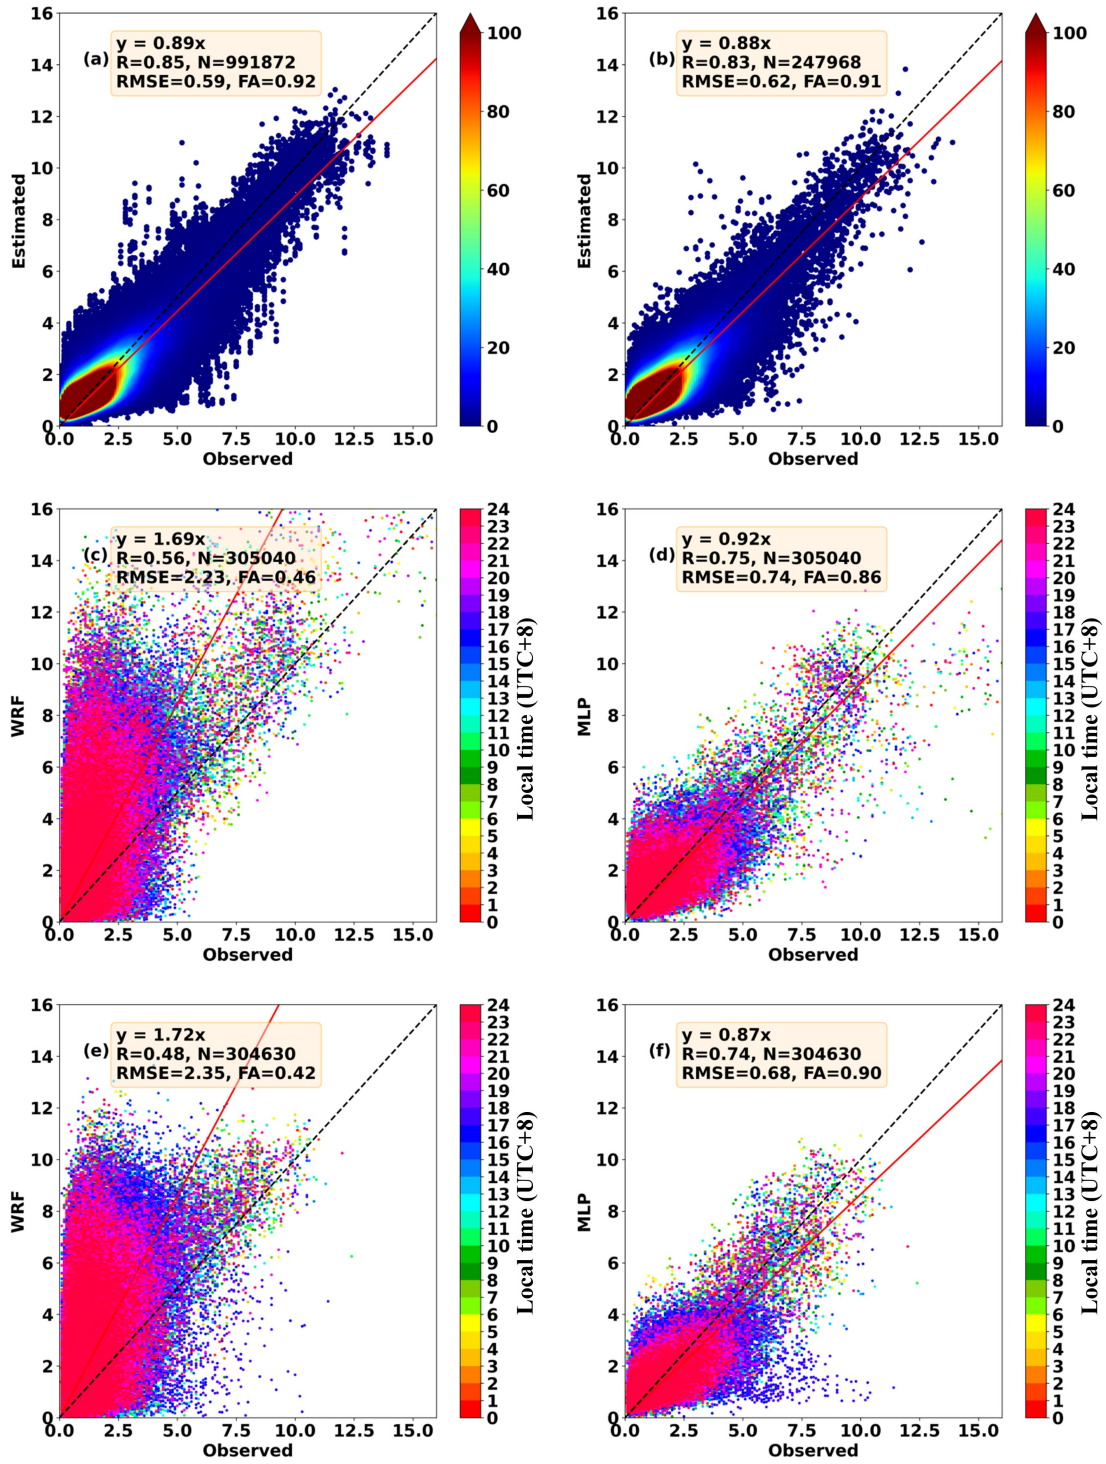

36  
 37  
 38  
 39  
 40  
 41  
 42

Figure S5. The scatter density map compared with the actual 10-meter wind speed: (a) 10-fold cross-validation training set of MLP model in February 2022, (b) 10-fold cross-validation validation set of MLP model in February 2022. The 24-hour scatter map compared with the actual 10-meter wind speed: (c) WRF forecasts in December 2021, (d) MLP model forecasts in December 2021, (e) WRF forecasts in January 2022, and (f) MLP model forecasts in January 2022.

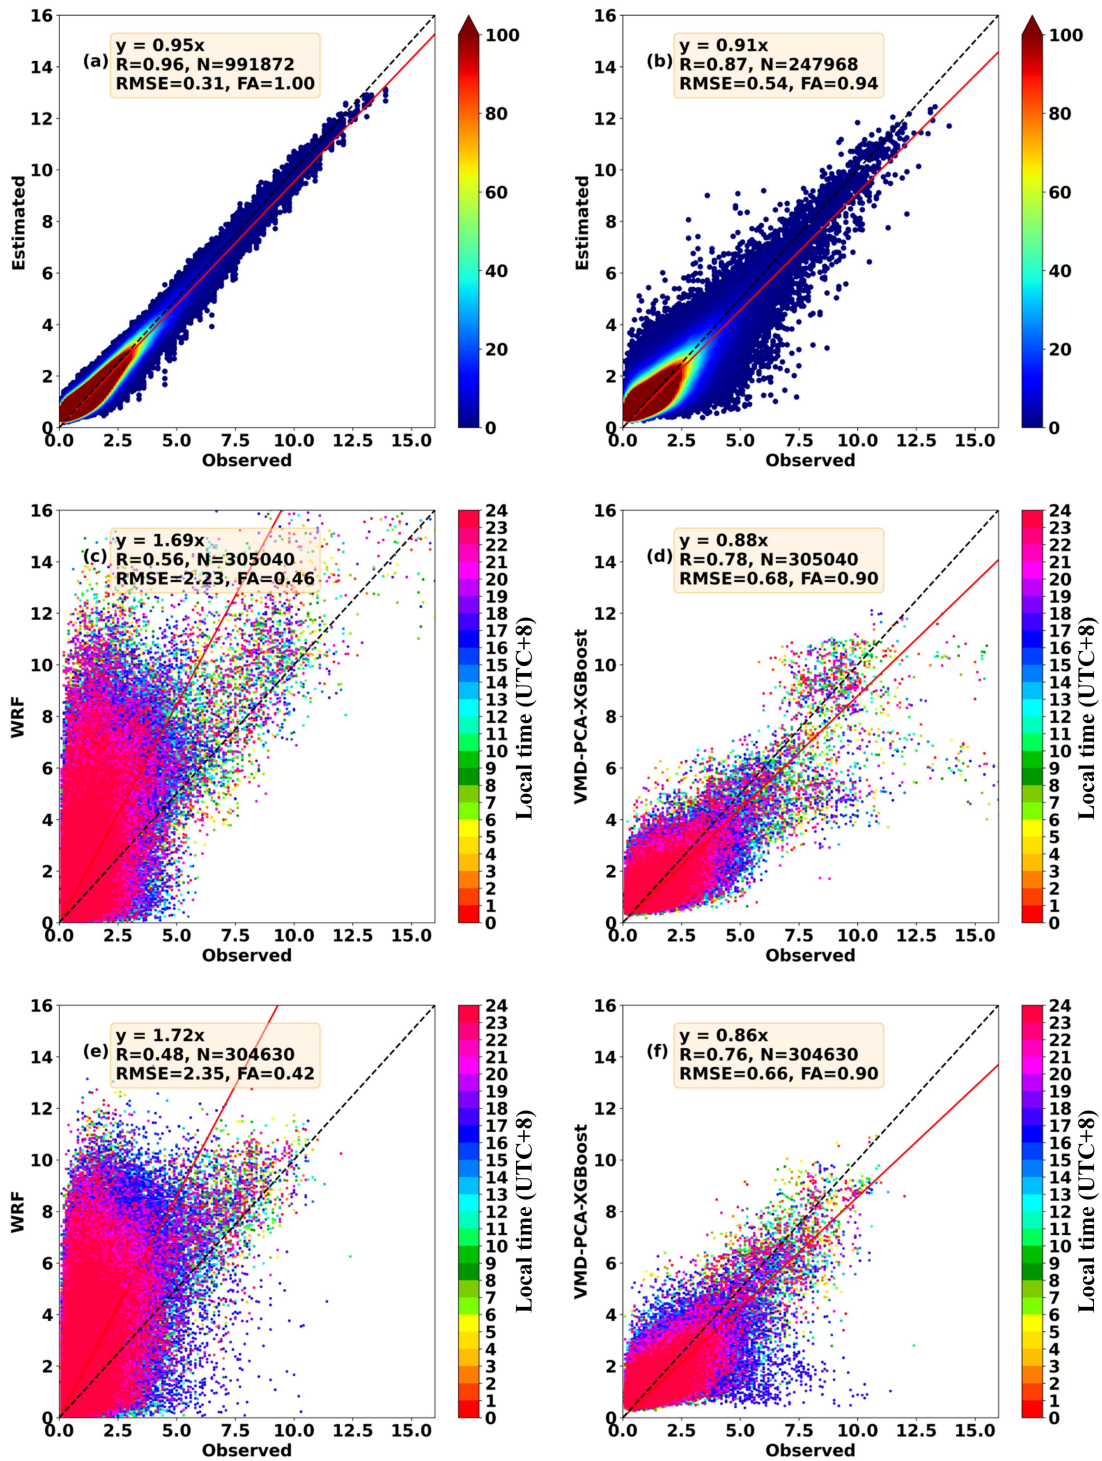

43

44 Figure S6. The scatter density map compared with the actual 10-meter wind speed: (a) 10-fold  
 45 cross-validation training set of VMD-PCA-XGBoost model in February 2022, (b) 10-fold cross-validation  
 46 validation set of VMD-PCA-XGBoost model in February 2022. The 24-hour scatter map compared with the  
 47 actual 10-meter wind speed: (c) WRF forecasts in December 2021, (d) VMD-PCA-XGBoost model forecasts  
 48 in December 2021, (e) WRF forecasts in January 2022, and (f) VMD-PCA-XGBoost model forecasts in  
 49 January 2022.

50

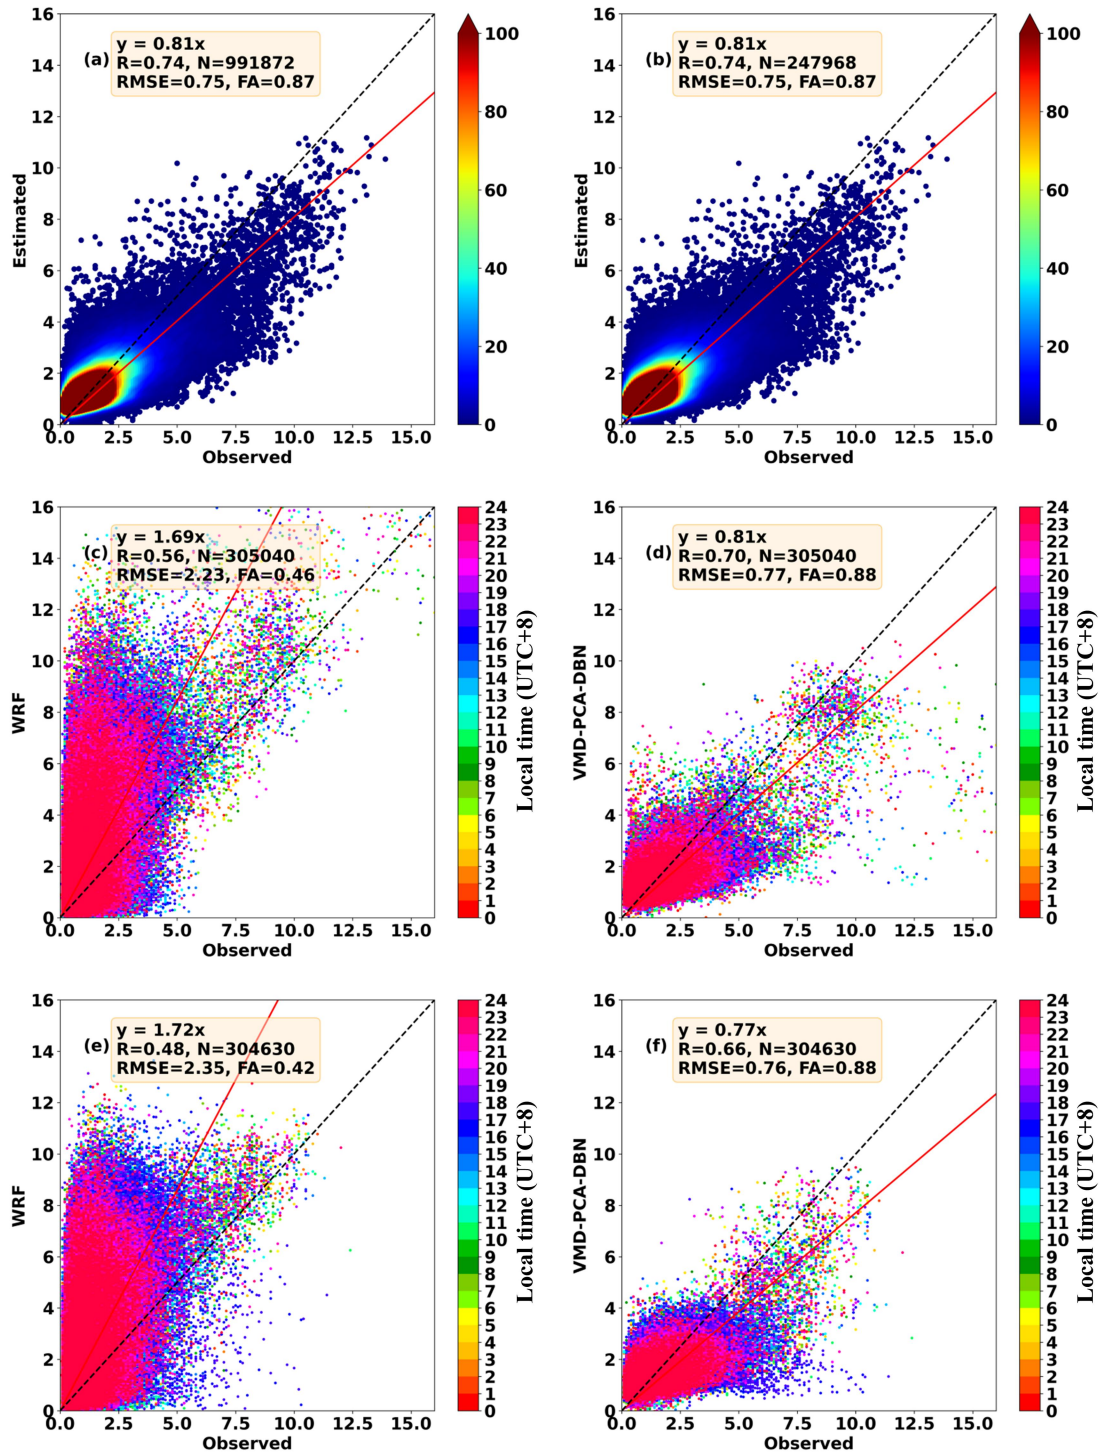

51

52 Figure S7. The scatter density map compared with the actual 10-meter wind speed: (a) 10-fold  
 53 cross-validation training set of VMD-PCA-DBN model in February 2022, (b) 10-fold cross-validation  
 54 validation set of VMD-PCA-DBN model in February 2022. The 24-hour scatter map compared with the  
 55 actual 10-meter wind speed: (c) WRF forecasts in December 2021, (d) VMD-PCA-DBN model forecasts in  
 56 December 2021, (e) WRF forecasts in January 2022, and (f) VMD-PCA-DBN model forecasts in January  
 57 2022.

58



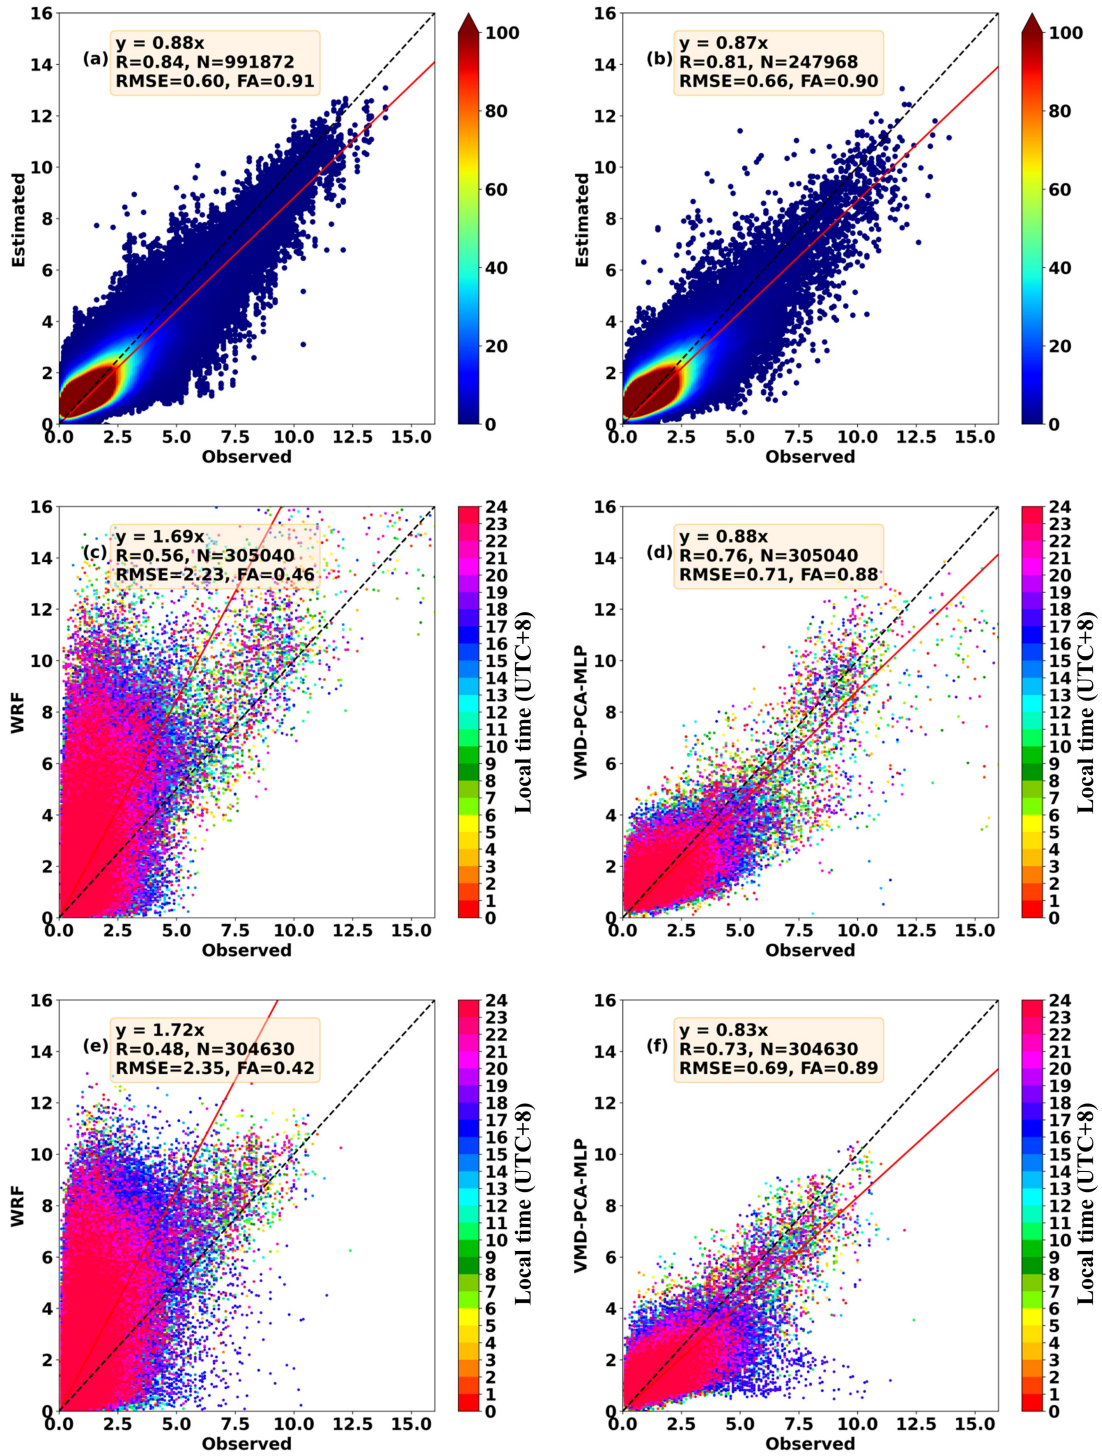

59

60 Figure S8. The scatter density map compared with the actual 10-meter wind speed: (a) 10-fold  
 61 cross-validation training set of VMD-PCA-MLP model in February 2022, (b) 10-fold cross-validation  
 62 validation set of VMD-PCA-MLP model in February 2022. The 24-hour scatter map compared with the  
 63 actual 10-meter wind speed: (c) WRF forecasts in December 2021, (d) VMD-PCA-MLP model forecasts in  
 64 December 2021, (e) WRF forecasts in January 2022, and (f) VMD-PCA-MLP model forecasts in January  
 65 2022.

66

67

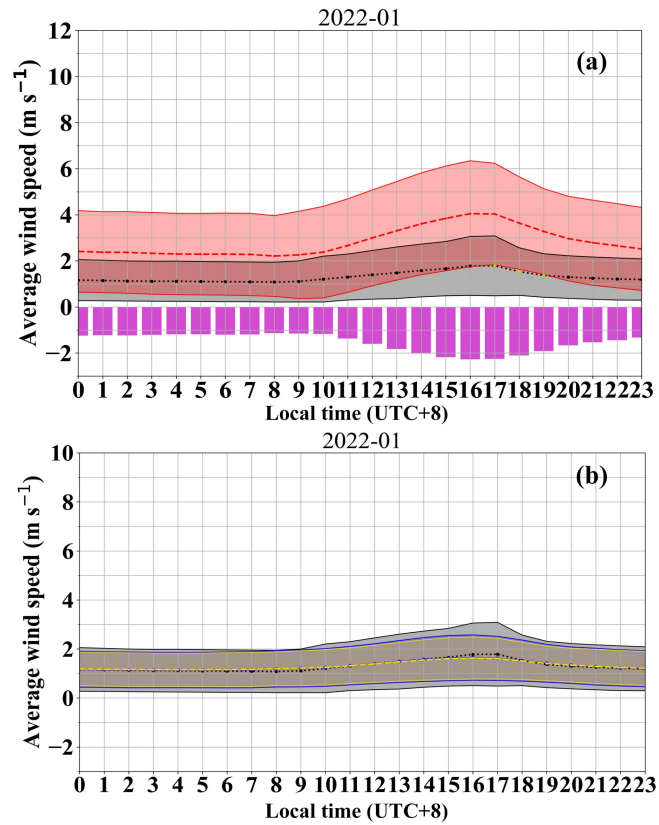

68  
 69 **Figure S9. VMD-PCA-lightGBM, VMD-PCA-RF, and WRF daily variation of predicted and actual wind**  
 70 **speeds in January 2022. (The shading areas represent an interval of 1 standard deviation, which is a 68%**  
 71 **confidence interval.)**

72

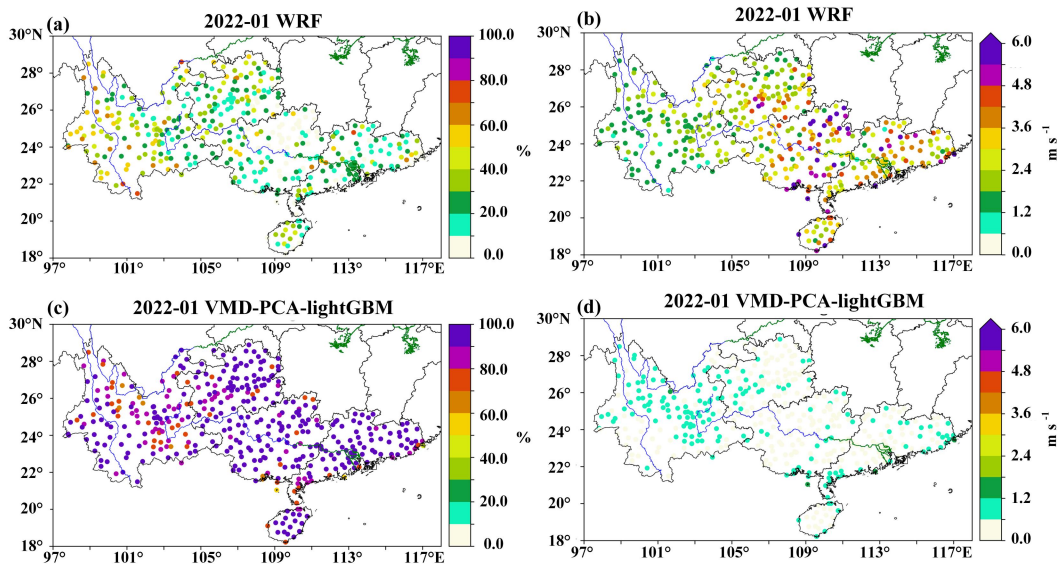

73  
 74 **Figure S10. FA ((a), (c)) and RMSE ((b), (d)) distribution maps of VMD-PCA-lightGBM and WRF models**  
 75 **on 410 sites in five southern provinces in January 2022.**

76

77



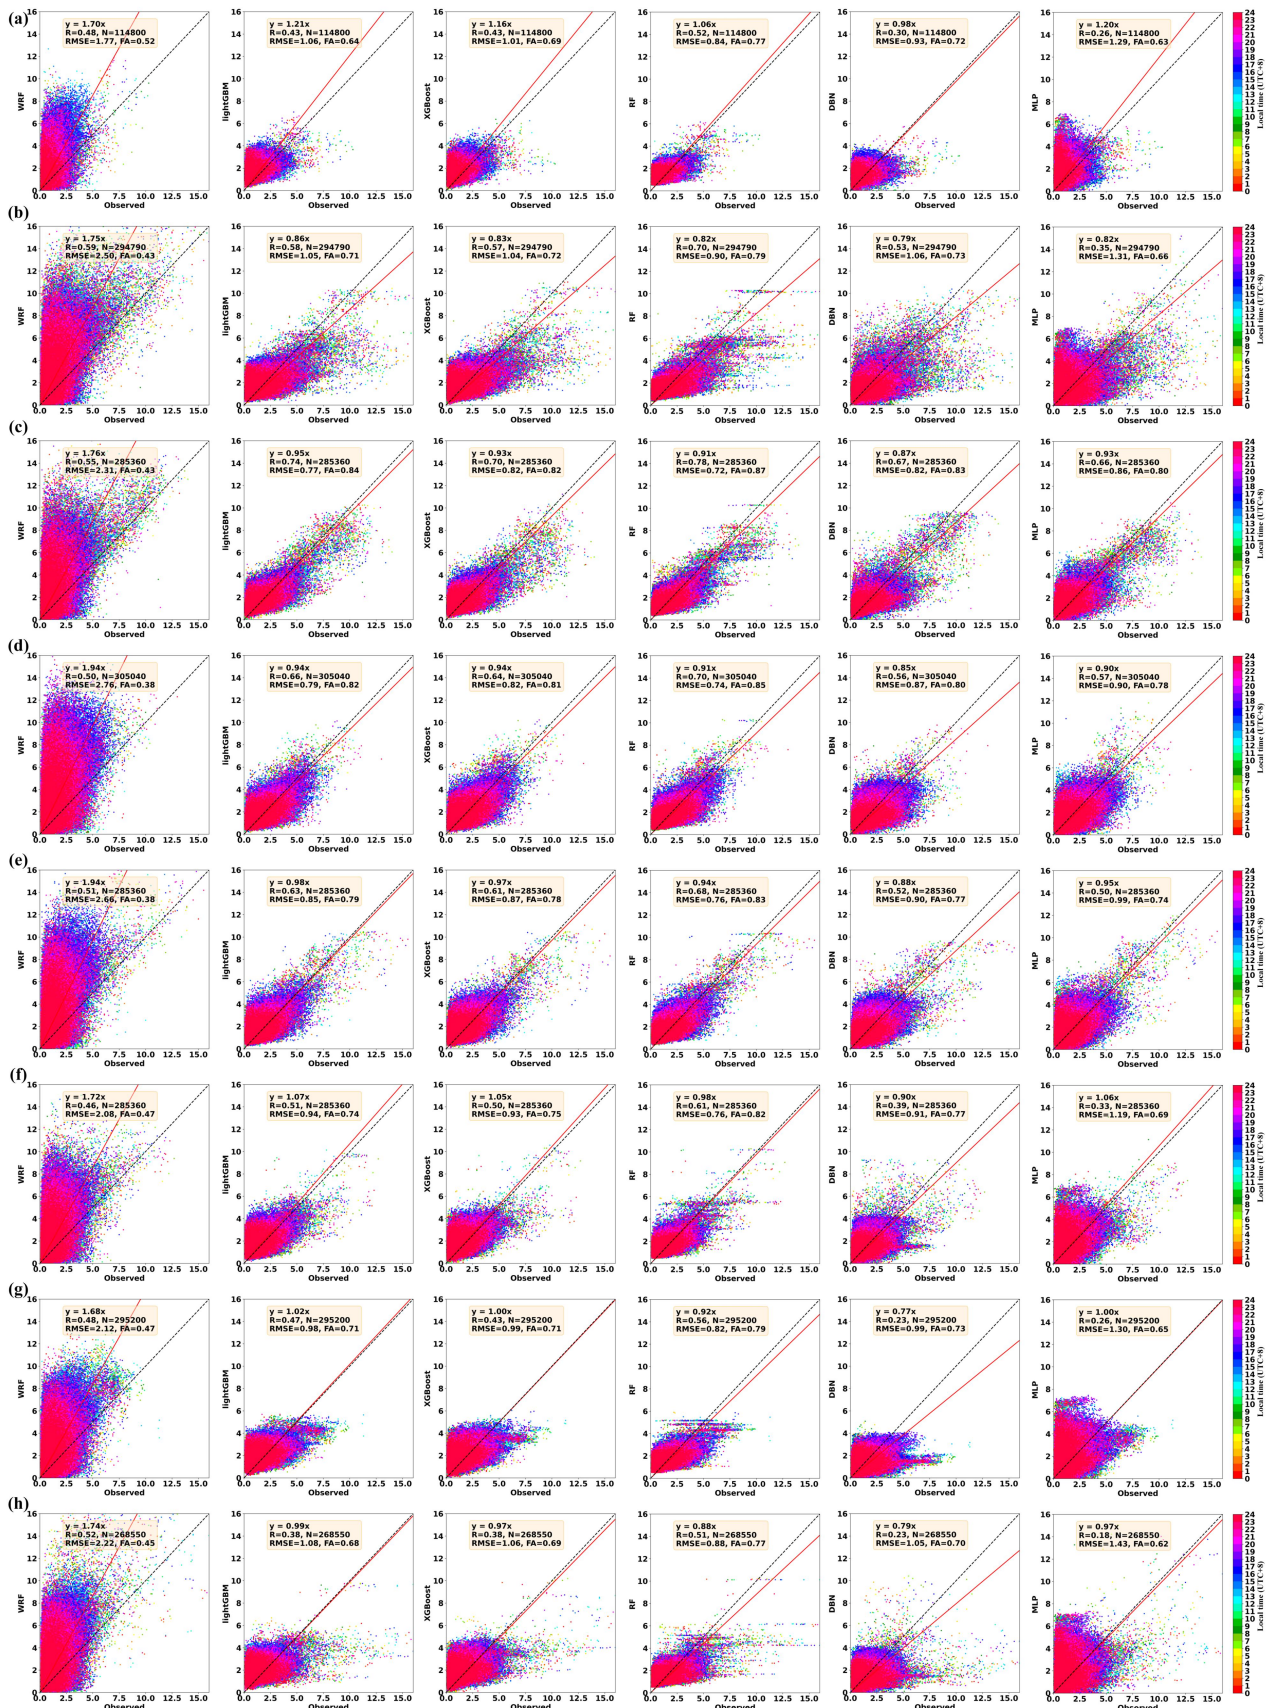

78 Figure S11. In Experiment 1, 24-hour scatter comparison of forecast wind speed and actual wind speed of  
 79 WRF, lightGBM, XGBoost, RF, DBN and MLP models in different months respectively. ((a), (b), (c), (d), (e),  
 80 (f), (g) and (h) respectively represent September 2021, October 2021, November 2021, March 2022, April  
 81 2022, May 2022, June 2022 and July 2022.)



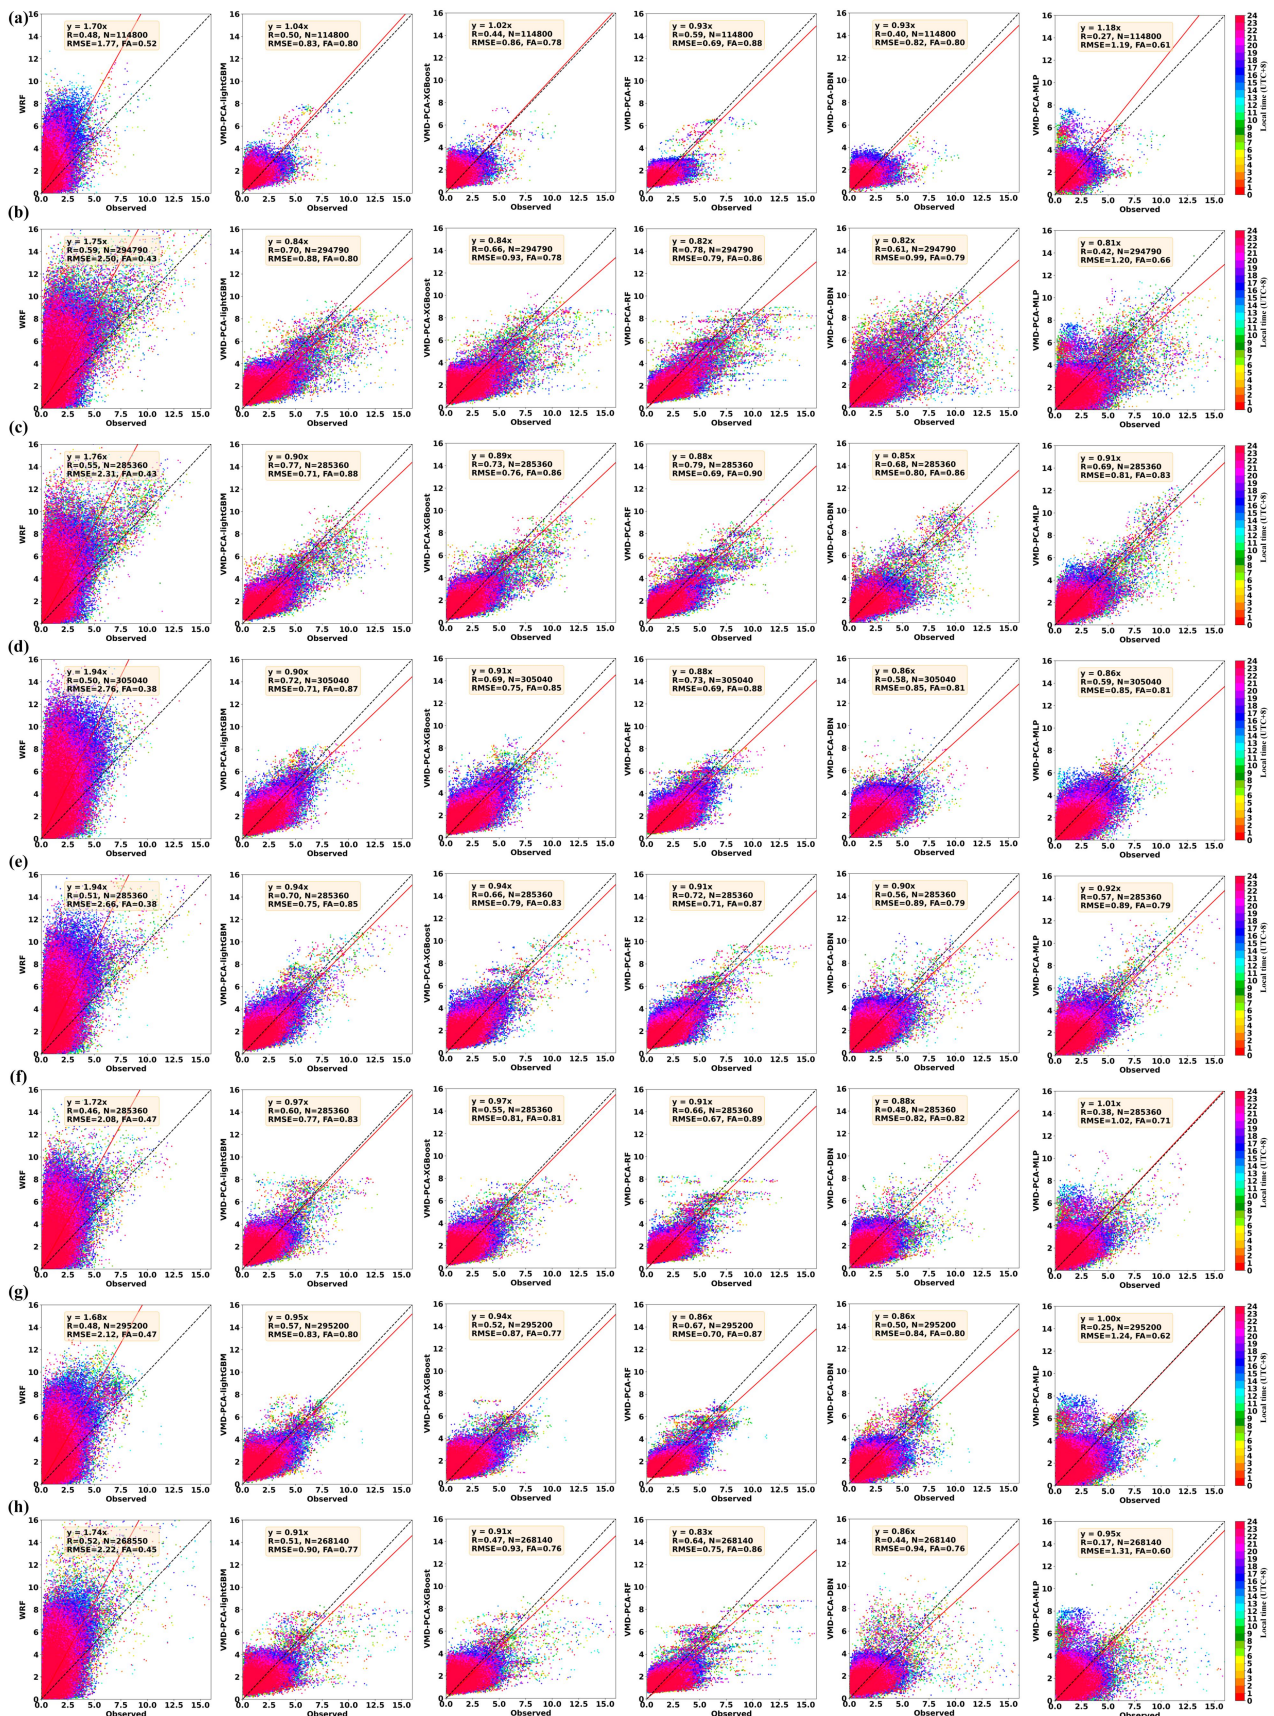

83 Figure S12. In Experiment 2, 24-hour scatter comparison of forecast wind speed and actual wind speed of  
 84 WRF, VMD-PCA-lightGBM, VMD-PCA-XGBoost, VMD-PCA-RF, VMD-PCA-DBN and VMD-PCA-MLP  
 85 models in different months respectively. ((a), (b), (c), (d), (e), (f), (g) and (h) respectively represent  
 86 September 2021, October 2021, November 2021, March 2022, April 2022, May 2022, June 2022 and July
